# Supplementary material for: Simulation of Large Scale Neural Models With Event-Driven Connectivity Generation
Source: Frontiers journal article supplement (doi:10.3389/fninf.2020.522000), 2020-10-14
Supplement: Table_1.pdf [file Table_1.pdf]

## Supplementary Material

In order to provide reproducible results, the relevant cell and synaptic parameters are given for each simulation (Tables S1, S2, S3 and S4). Each experiment mentioned in the paper is given a name and the list of its related figures:

- *Method order*: comparison of the simulation accuracy orders between different spike detection methods (Figure 5).
- *Memory and time*: comparison of memory consumption and execution times between **BRIAN2** and the event driven updating and the time-stepping approaches with and without connectivity storage, proposed in **SiReNe** (Figures 6 and 7).
- *Parallel performance*: performance evaluation of the parallel version of **SiReNe** (Figures 8 and 9).
- *Network comparison*: comparison of the average number of spikes per neuron and the simulation times as a function of connectivity, for three different network sizes (Figure 10).
- *Reference (striatum)*: simulation of the MSN network with 1.3M neurons (Figures 11 and 12).

Table S1 provides the general parameters for each simulation. The first line gives the corresponding figures in Section 4. The other lines correspond to the different simulation parameters, like the interpolation method used to compute the spike times, the numerical method, the membrane potential threshold for the spike detection, the simulation start and duration, the time-step and the number of threads used during the simulation.

| General Parameters   | Experimental contexts |                               |                 |                      |                    |
|----------------------|-----------------------|-------------------------------|-----------------|----------------------|--------------------|
|                      | Reference (striatum)  | Method order                  | Memory and time | Parallel performance | Network comparison |
| Figure(s)            | 11 & 12               | 5                             | 6 & 7           | 8 & 9                | 10                 |
| Network size         | 1.3M                  | 1                             | 100 – 10k       | 10k                  | 100 – 2000         |
| Interpolation type   | Bézier curve          | Lines Intersection/ Threshold | Bézier curve    | Bézier curve         | Bézier curve       |
| Numerical method     | RK2                   | RK2                           | RK2             | RK2                  | RK2                |
| Spike threshold [mV] | 0                     | 0                             | 0               | 0                    | 0                  |
| Duration [ms]        | 4000                  | 20                            | 100             | 1000                 | 4000               |
| time-step [ms]       | 0.01                  | $0.01 - 5e^{-5}$              | 0.005           | 0.005                | 0.005              |
| #threads             | 32                    | 1                             | 1               | 1 – 32               | 1                  |

**Table S1.** General parameters of the presented experiments.

In Table S2 are given the input current parameters. The input current types are either a constant current or a step current with noise. For the step current, a negative current is introduced in the first seconds. Then, a positive current, smaller than one, is injected. In addition, a noise is applied over the step time in order to avoid a similar step for all the neurons. Finally, a noise amplitude is also added to the input current.

| <i>Input current<br/>Parameters</i>                                      | <i>Experimental contexts</i>    |                         |                            |                                 |                               |
|--------------------------------------------------------------------------|---------------------------------|-------------------------|----------------------------|---------------------------------|-------------------------------|
|                                                                          | <b>Reference<br/>(striatum)</b> | <b>Method<br/>order</b> | <b>Memory<br/>and time</b> | <b>Parallel<br/>performance</b> | <b>Network<br/>comparison</b> |
| <i>Input Current type</i>                                                | Noisy step                      | Constant                | Noisy step                 | Noisy step                      | Noisy step                    |
| <i>Step time [ms]</i>                                                    | 500                             | /                       | 50                         | 100                             | 100                           |
| <i>Noise</i>                                                             | $\times[0, 1]$                  | /                       | $\times[0, 1]$             | $\times[0, 1]$                  | $\times[0, 1]$                |
| <i><math>I_{input}</math> [<math>\mu A</math>]</i>                       | /                               | 0.5                     | /                          | /                               | /                             |
| <i><math>I_{input}</math> [<math>\mu A</math>] the 1<sup>st</sup> ms</i> | -10                             | /                       | -10                        | -10                             | -10                           |
| <i><math>I_{input}</math> [<math>\mu A</math>] the 2<sup>nd</sup> ms</i> | 1.19                            | /                       | 0.5                        | 0.4                             | 0.5                           |
| <i>Noise amplitude [%]</i>                                               | 300                             | /                       | 300                        | 300                             | 300                           |

**Table S2.** Input Current parameters of the presented experiments.

As shown in Table S3, the neuron initialization values and parameters are the same for all the experiments. A heterogeneity percentage is added to the initialization parameters. The only parameter that varies from one experiment to another is the maximal conductance  $g_m$ . For *Memory and time* and *Parallel performance*, the conductance is 0.25 mS, while it is 0.6 mS for *Network comparison*.

| <i>Neuron<br/>Initialization<br/>Parameters</i> | <b>For all<br/>experiments</b> | <i>Neuron<br/>Parameters</i>    | <b>For all<br/>experiments</b> |
|-------------------------------------------------|--------------------------------|---------------------------------|--------------------------------|
| $V$ [mV]                                        | -63.826                        | $C_m$ [pF]                      | 1.0                            |
| $m$                                             | 0.027781                       | $g_L$ [mS]                      | 0.1                            |
| $h$                                             | 0.990915                       | $E_L$ [mV]                      | -67.0                          |
| $n$                                             | 0.062045                       | $g_{Na}$ [mS]                   | 100.0                          |
| $p$                                             | 0.022788                       | $E_{Na}$ [mV]                   | 50.0                           |
| <i>Heterogeneity [%]</i>                        | 10                             | $g_K$ [mS]                      | 80.0                           |
|                                                 |                                | $E_K$ [mV]                      | -100.0                         |
|                                                 |                                | $g_M$ [mS] ( <i>normal</i> )    | 1.34                           |
|                                                 |                                | $g_M$ [mS] ( <i>Parkinson</i> ) | 1.1                            |

**Table S3.** Neurons initialization parameters and neurons parameters for all the presented experiments.

The synaptic parameters are provided in Table S4. The synaptic conductance is divided by the number of connections. The **BRIAN2** parameters are not provided as they are the same as the *Memory and time* experiment. The only difference lies in the spike time computation, since the only available approach in **BRIAN2** is the alignment to the time-step.

| <i>Synaptic<br/>Parameters</i> | <i>Experimental contexts</i>    |                         |                            |                                 |                               |
|--------------------------------|---------------------------------|-------------------------|----------------------------|---------------------------------|-------------------------------|
|                                | <b>Reference<br/>(striatum)</b> | <b>Method<br/>order</b> | <b>Memory<br/>and time</b> | <b>Parallel<br/>performance</b> | <b>Network<br/>comparison</b> |
| <i>Network size</i>            | 1.3M                            | 1                       | 100 – 10k                  | 10k                             | 100 – 2000                    |
| <i>connections [%]</i>         | 0.0004                          | /                       | 30 – 100                   | 0.05                            | 1 – 100                       |
| $\tau$ [ms]                    | 15                              | /                       | 12                         | 12                              | 12                            |
| $E_{syn}$ [mV]                 | –80.0                           | /                       | –80.0                      | –80.0                           | –80.0                         |
| $g_{syn}$ [nS]/#connections    | 0.1 – 0.6                       | /                       | 0.6                        | 0.25                            | 0.2 – 1.0                     |

**Table S4.** Synaptic parameters of the presented experiments.
